# Supplementary material
Source: PubMed Central journal article supplement (PMC3044683)

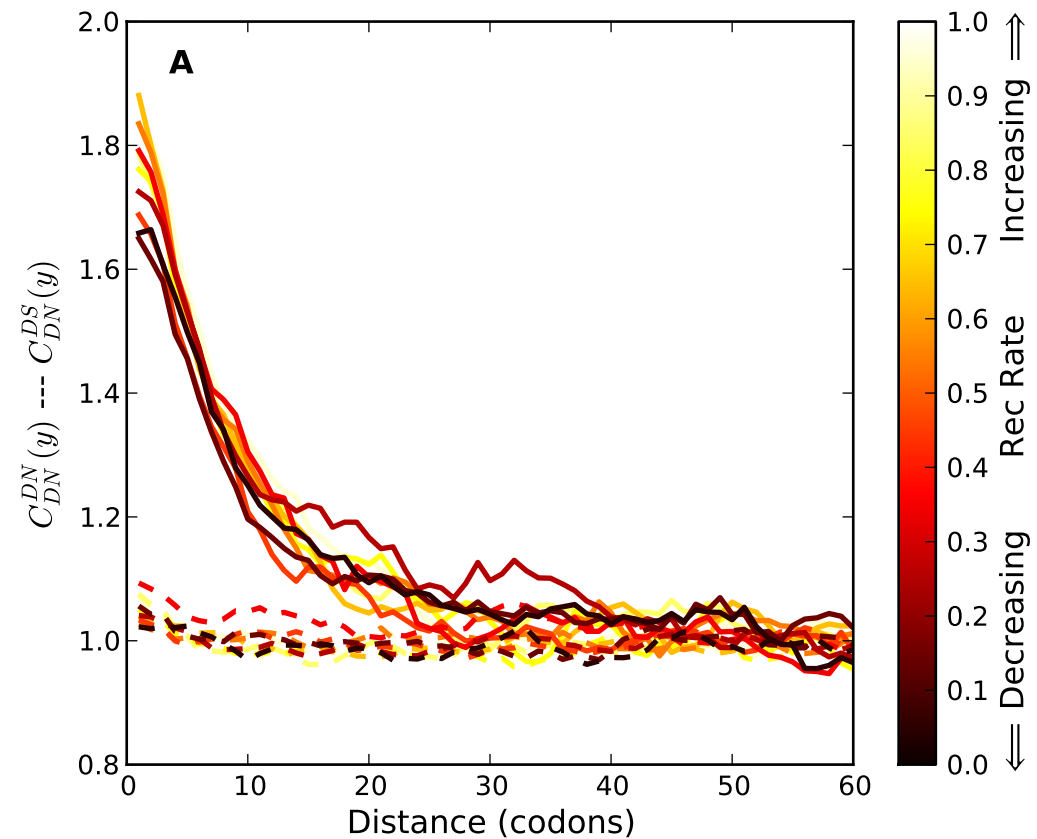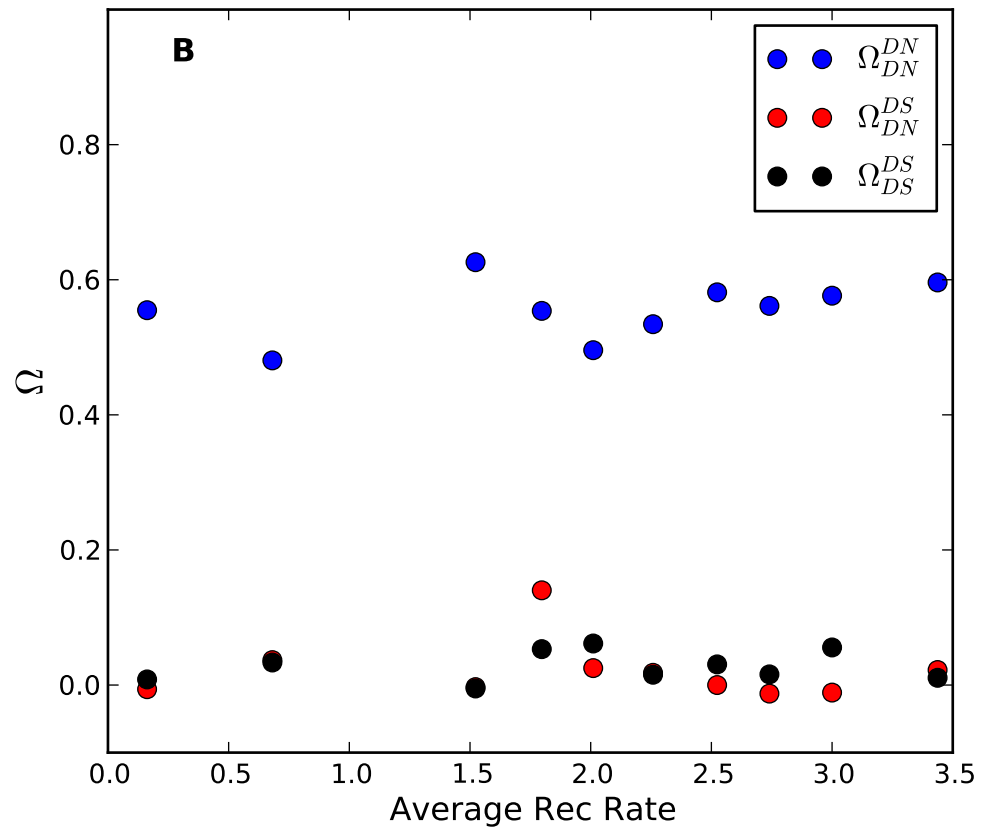

Supplement: pgen.1001315.s003.pdf [file pgen.1001315.s003.pdf]

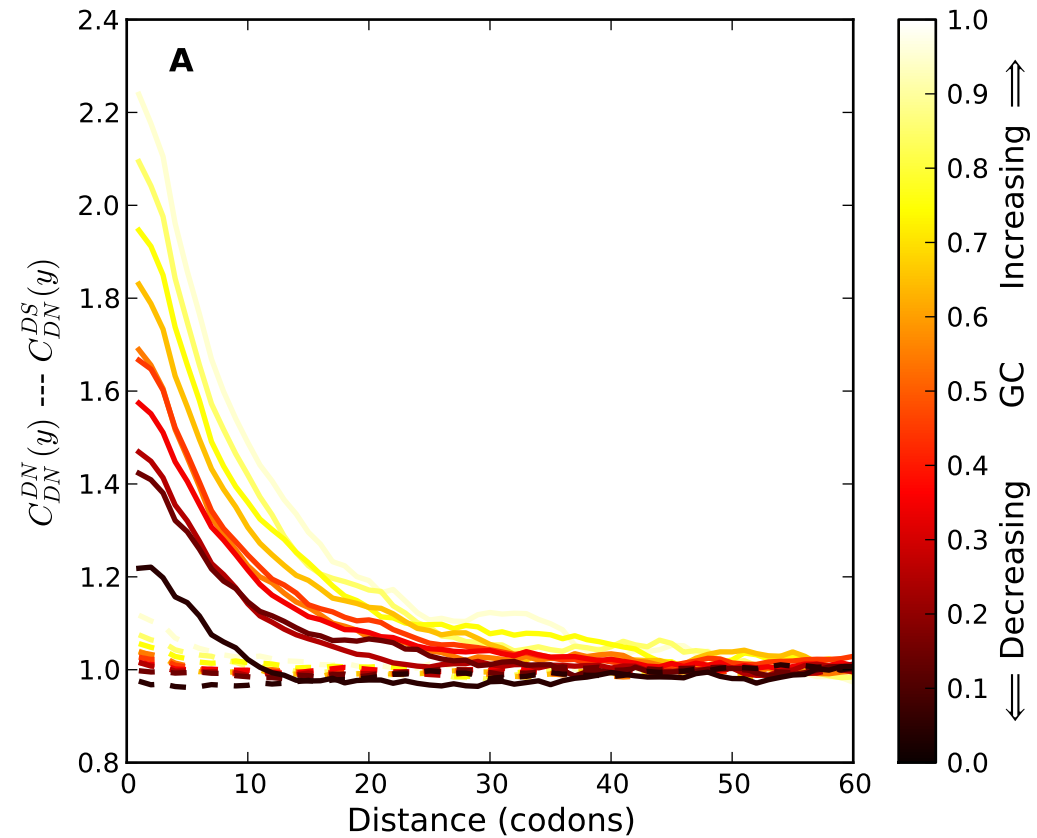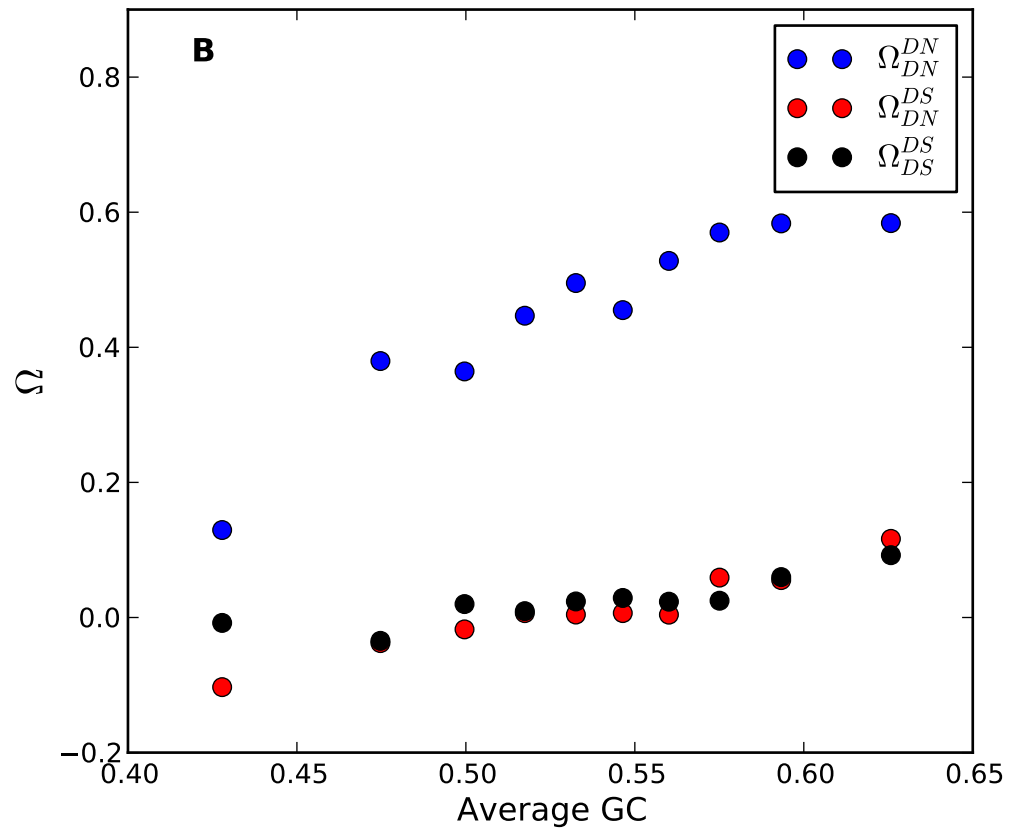

Supplement: pgen.1001315.s005.pdf [file pgen.1001315.s005.pdf]

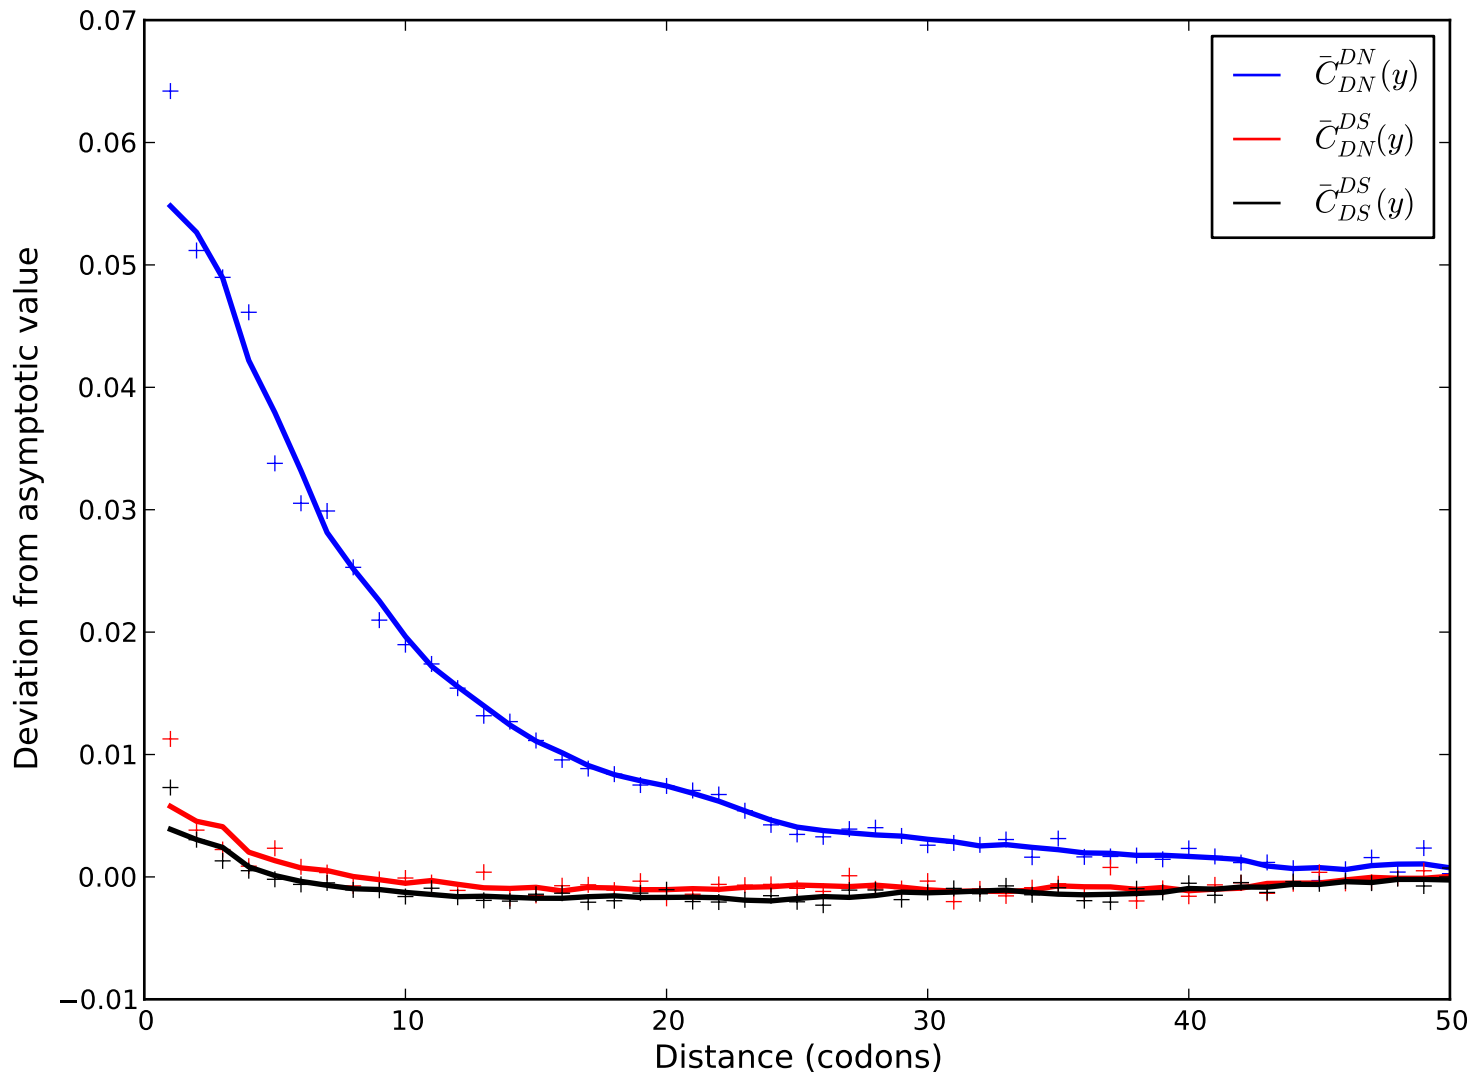

Supplement: pgen.1001315.s006.pdf [file pgen.1001315.s006.pdf]

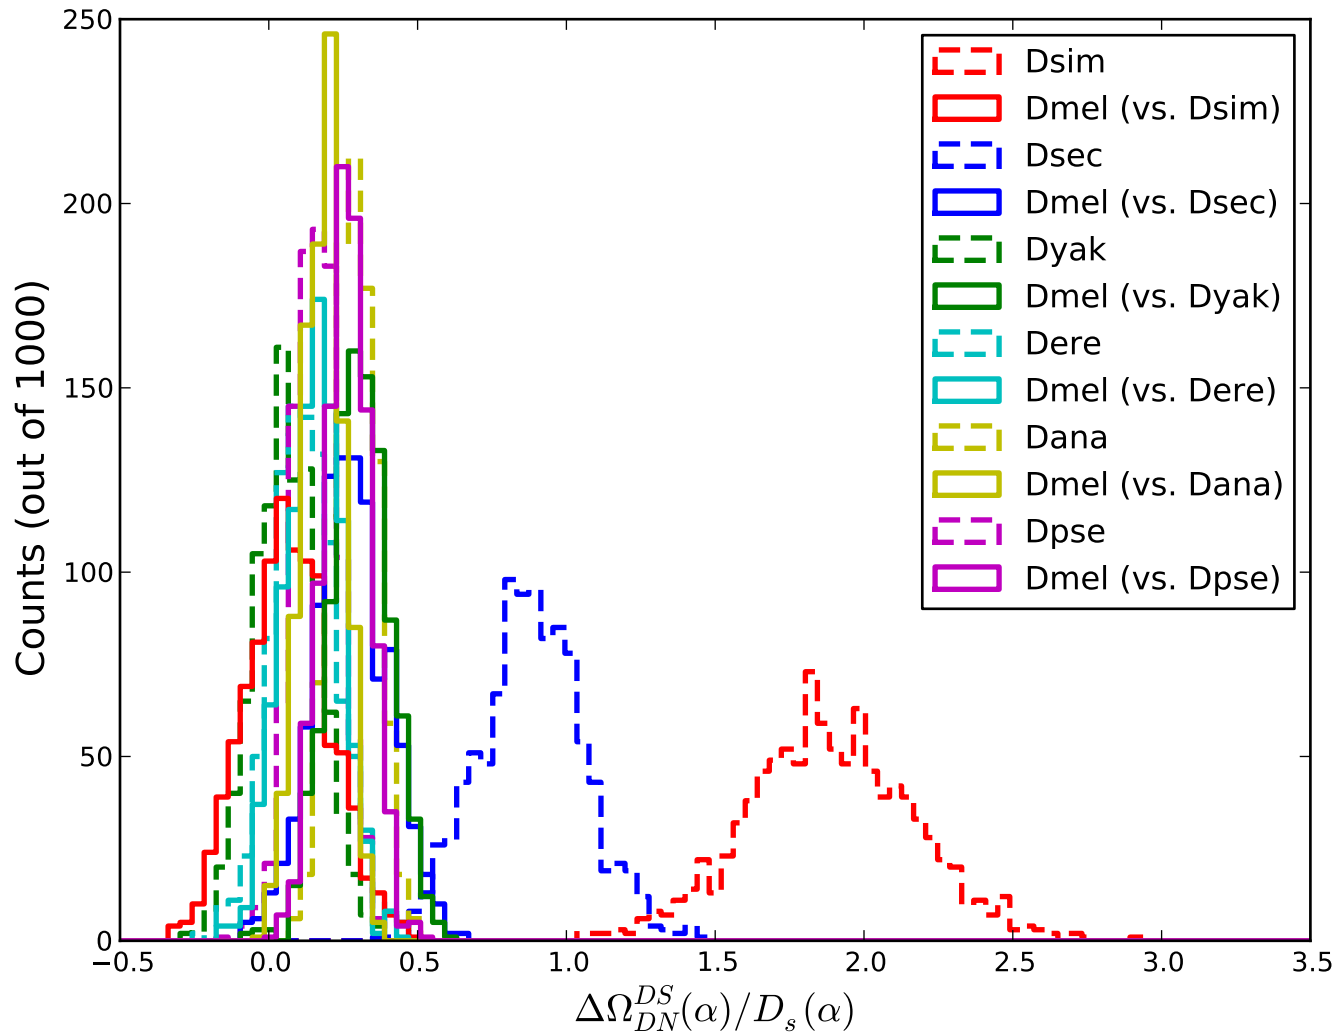

Supplement: pgen.1001315.s010.pdf [file pgen.1001315.s010.pdf]
